# Supplementary material
Source: publisher figshare collection journal article supplement (https://acs.figshare.com/ndownloader/files/5688594)
Supplement: Supplementary file 1 [file 5688594]

# ic000810b.cif

data_e061

_publ_contact_author_name         'Prof. Thomas M. Klapoetke'
_publ_contact_author_address
;
Department of Chemistry
Ludwig-Maximilians-University
Butenandtstr. 5-13 (Haus D)
D-81377 Munich, Germany
;
_publ_contact_author_email        'tmk@cup.uni-muenchen.de'
_publ_contact_author_phone        '+49 89 2180 7491'
_publ_contact_author_fax          '+49 89 2180 7492' 

_publ_author_name                 'Krumm, Burkhard'
_publ_author_name                 'Ruscitti, Oliver P.'
_publ_author_name                 'Mayer, Peter'

_publ_requested_journal           'Inorg. Chem.'

_publ_section_title              
;
First Synthesis and Structures of Aryltellurium(IV) Diazides
;

_audit_author_name                'Mayer, P., Piotrowski, H., Warchtold, M.'
_audit_block_code                 Te_(N3)2_(C6F5)2_e061_klapoetke
_audit_creation_method            'form98_1/compatible with shelxl97-2'
_audit_creation_date              08-Mar-00

_chemical_name_systematic         ?
_chemical_compound_source         ?

_chemical_name_common              'Te(N3)2(C6F5)2'
_chemical_formula_moiety          'Te F10 N6 C12'
_chemical_formula_sum
 'C12 F10 N6 Te'
_chemical_formula_weight          545.75

loop_
 _atom_type_symbol
 _atom_type_description
 _atom_type_scat_dispersion_real
 _atom_type_scat_dispersion_imag
 _atom_type_scat_source
'C'  'C'   0.0033   0.0016
'International Tables Vol C Tables 4.2.6.8 and 6.1.1.4'
'N'  'N'   0.0061   0.0033
'International Tables Vol C Tables 4.2.6.8 and 6.1.1.4'
'F'  'F'   0.0171   0.0103
'International Tables Vol C Tables 4.2.6.8 and 6.1.1.4'
'Te'  'Te'  -0.5308   1.6751
'International Tables Vol C Tables 4.2.6.8 and 6.1.1.4'

_symmetry_cell_setting            monoclinic
_symmetry_space_group_name_H-M    'P 21/c'
_symmetry_Int_Tables_number       14

loop_
 _symmetry_equiv_pos_as_xyz
'x, y, z'
'-x, y+1/2, -z+1/2'
'-x, -y, -z'
'x, -y-1/2, z-1/2'

_cell_length_a                    15.3104(13)
_cell_length_b                    6.1035(3)
_cell_length_c                    18.0152(13)
_cell_angle_alpha                 90
_cell_angle_beta                  113.348(9)
_cell_angle_gamma                 90
_cell_volume                      1545.61(19)
_cell_formula_units_Z             4
_cell_measurement_temperature     200(3)
_cell_measurement_reflns_used     5000
_cell_measurement_theta_min       2.3
_cell_measurement_theta_max       25.9
_cell_special_details             'Monoclinic P (as derived from metrics)'

_exptl_crystal_description        irregular
_exptl_crystal_colour             colourless
_exptl_crystal_size_max           0.25
_exptl_crystal_size_mid           0.15
_exptl_crystal_size_min           0.06
_exptl_crystal_density_meas       ?
_exptl_crystal_density_diffrn     2.3454(3)
_exptl_crystal_density_method     'not measured'
_exptl_crystal_F_000              1024
_exptl_absorpt_coefficient_mu     2.052
_exptl_absorpt_correction_type    numerical
_exptl_absorpt_correction_T_min   0.8058
_exptl_absorpt_correction_T_max   0.9092
_exptl_absorpt_process_details    'XRed, rev. 1.09, Stoe (Darmstadt, Germany)'
_exptl_special_details            ?

loop_
 _exptl_crystal_face_index_h
 _exptl_crystal_face_index_k
 _exptl_crystal_face_index_l
 _exptl_crystal_face_perp_dist
0   0   1  0.0320
0   0  -1  0.0210
8   0  -5  0.0400
-8   0   5  0.0550
-7  -5  -4  0.0740
-5   3   7  0.0860
1   1   0  0.1300
0  -1   6  0.0490
-2  -3  -9  0.0660
1  -2  -2  0.0950
3   0   4  0.0380

_diffrn_ambient_temperature       200(3)
_diffrn_source_type                'Spellman DF4 Series'
_diffrn_source_power               2.75_kW
_diffrn_source_voltage             55_kV
_diffrn_source_current             50_mA
_diffrn_radiation_wavelength      0.71073
_diffrn_radiation_type            MoK\a
_diffrn_radiation_source          'fine-focus sealed tube'
_diffrn_radiation_monochromator   graphite
_diffrn_radiation_collimation     '0.5 mm collimator'
_diffrn_measurement_device        'image-plate area detector'
_diffrn_measurement_device_type   'Stoe IPDS'
_diffrn_measurement_method        'area detection'
_diffrn_detector_area_resol_mean  ?
_kl_diffrn_detector_area_phi_start      0.0
_kl_diffrn_detector_area_phi_end        120.0
_kl_diffrn_detector_area_phi_incr       1.0
_kl_diffrn_detector_area_expos_time     4.00_min
_kl_diffrn_detector_area_plate_dist     70.0_mm
_kl_diffrn_detector_area_eff_mos_spread 0.005
_kl_diffrn_detector_area_profile_funct  dynamic
_kl_diffrn_detector_area_profile_min    11
_kl_diffrn_detector_area_profile_max    19

_diffrn_special_details           ?

_diffrn_reflns_number             6923
_diffrn_reflns_av_R_equivalents   0.0309
_diffrn_reflns_av_sigmaI/netI     0.0336
_diffrn_reflns_limit_h_min        -11
_diffrn_reflns_limit_h_max        18
_diffrn_reflns_limit_k_min        -7
_diffrn_reflns_limit_k_max        7
_diffrn_reflns_limit_l_min        -22
_diffrn_reflns_limit_l_max        22
_diffrn_reflns_theta_min          2.31
_diffrn_reflns_theta_max          25.86
_diffrn_measured_fraction_theta_max    0.957
_diffrn_reflns_theta_full              25.86
_diffrn_measured_fraction_theta_full   0.957

_refine_diff_density_max    0.329
_refine_diff_density_min   -0.372
_refine_diff_density_rms    0.076

_reflns_number_total              2868
_reflns_number_gt                 2060
_reflns_threshold_expression      >2sigma(I)
_reflns_special_details           ?

_computing_data_collection        'Stoe IPDS software (Darmstadt, Germany)'
_computing_cell_refinement        'Stoe IPDS software (Darmstadt, Germany)'
_computing_data_reduction         'Stoe IPDS software (Darmstadt, Germany)'
_computing_structure_solution
 'SIR97 (Cascarano et al.,Acta Crystallogr., Sect A, 1996, C79)'

_computing_structure_refinement
 'SHELXL-97 (G. M. Sheldrick. University of G\"ottingen, 97-2 version)'

_computing_molecular_graphics
;ORTEP (M. N. Burnett, C. K. Johnson, ORTEP-III: Oak Ridge Thermal Ellipsoid
 Plot Program for Crystal Structure Illustrations, Oak Ridge National
 Laboratory Report ORNL-6895, 1996). Windows version (L. J. Farrugia, Univ.
 Glasgow) used --- SCHAKAL (E. Keller, University of  Freiburg (Breisgau),
 Germany, 1995).
;

_computing_publication_material
;PLATON (A. L. Spek, Acta Crystallogr, Sect. A, 1990, 46, C34, 1995 version).
--- T.B.Cohen, Pure Appl. Chem. 1996,68,2339-2359 (atomic masses).
;

_refine_ls_structure_factor_coef  Fsqd
_refine_ls_matrix_type            full
_refine_ls_weighting_scheme       calc
_atom_sites_solution_primary      direct
_atom_sites_solution_secondary    difmap
_atom_sites_solution_hydrogens    geom
_refine_ls_hydrogen_treatment     none
_refine_ls_extinction_method      none
_refine_ls_extinction_coef        ?
_refine_ls_abs_structure_details  ?
_refine_ls_abs_structure_Flack    ?
_refine_ls_number_reflns          2868
_refine_ls_number_parameters      262
_refine_ls_number_restraints      0
_refine_ls_R_factor_all           0.0361
_refine_ls_R_factor_gt            0.0204
_refine_ls_wR_factor_ref          0.0444
_refine_ls_wR_factor_gt           0.0417
_refine_ls_goodness_of_fit_ref    0.892
_refine_ls_restrained_S_all       0.892
_refine_ls_shift/su_max           0.001
_refine_ls_shift/su_mean          0.000
_refine_special_details           ?

loop_
 _atom_site_label
 _atom_site_type_symbol
 _atom_site_fract_x
 _atom_site_fract_y
 _atom_site_fract_z
 _atom_site_U_iso_or_equiv
 _atom_site_adp_type
 _atom_site_occupancy
 _atom_site_symmetry_multiplicity
 _atom_site_calc_flag
 _atom_site_refinement_flags
 _atom_site_disorder_assembly
 _atom_site_disorder_group
Te Te 0.313833(12) 0.00280(4) 0.216243(9) 0.01547(6) Uani 1 1 d . . .
N1 N 0.36706(19) -0.2920(4) 0.29179(13) 0.0227(6) Uani 1 1 d . . .
N2 N 0.41548(19) -0.4201(4) 0.27363(13) 0.0192(5) Uani 1 1 d . . .
N3 N 0.4590(2) -0.5543(4) 0.25993(16) 0.0302(7) Uani 1 1 d . . .
N4 N 0.22999(19) 0.2937(4) 0.16107(14) 0.0230(6) Uani 1 1 d . . .
N5 N 0.2588(2) 0.4012(4) 0.11861(14) 0.0250(6) Uani 1 1 d . . .
N6 N 0.2812(3) 0.5132(7) 0.0783(2) 0.0538(9) Uani 1 1 d . . .
C11 C 0.1798(2) -0.1478(5) 0.18245(16) 0.0188(6) Uani 1 1 d . . .
C21 C 0.1448(2) -0.2429(5) 0.23537(16) 0.0194(6) Uani 1 1 d . . .
C31 C 0.0589(3) -0.3461(5) 0.20777(19) 0.0271(7) Uani 1 1 d . . .
C41 C 0.0034(2) -0.3588(5) 0.1257(2) 0.0293(7) Uani 1 1 d . . .
C51 C 0.0368(2) -0.2626(5) 0.07228(17) 0.0272(7) Uani 1 1 d . . .
C61 C 0.1230(2) -0.1616(5) 0.10058(16) 0.0216(6) Uani 1 1 d . . .
F21 F 0.19486(14) -0.2324(3) 0.31528(9) 0.0268(4) Uani 1 1 d . . .
F31 F 0.02572(15) -0.4328(3) 0.25978(12) 0.0382(5) Uani 1 1 d . . .
F41 F -0.07909(15) -0.4631(4) 0.09890(13) 0.0462(6) Uani 1 1 d . . .
F51 F -0.01653(15) -0.2722(3) -0.00767(10) 0.0411(5) Uani 1 1 d . . .
F61 F 0.15536(14) -0.0767(3) 0.04737(9) 0.0299(4) Uani 1 1 d . . .
C12 C 0.3285(2) 0.1446(5) 0.32710(15) 0.0175(6) Uani 1 1 d . . .
C22 C 0.4192(2) 0.1559(5) 0.38794(16) 0.0217(6) Uani 1 1 d . . .
C32 C 0.4338(3) 0.2521(6) 0.46106(16) 0.0274(7) Uani 1 1 d . . .
C42 C 0.3590(3) 0.3364(5) 0.47490(17) 0.0305(8) Uani 1 1 d . . .
C52 C 0.2681(3) 0.3298(5) 0.41497(18) 0.0282(7) Uani 1 1 d . . .
C62 C 0.2549(2) 0.2353(5) 0.34192(17) 0.0229(6) Uani 1 1 d . . .
F22 F 0.49364(13) 0.0753(3) 0.37665(10) 0.0274(4) Uani 1 1 d . . .
F32 F 0.52214(15) 0.2611(3) 0.51876(10) 0.0382(5) Uani 1 1 d . . .
F42 F 0.37402(19) 0.4297(3) 0.54615(11) 0.0477(6) Uani 1 1 d . . .
F52 F 0.19562(18) 0.4149(4) 0.42777(12) 0.0436(5) Uani 1 1 d . . .
F62 F 0.16531(13) 0.2289(3) 0.28544(10) 0.0286(4) Uani 1 1 d . . .

loop_
 _atom_site_aniso_label
 _atom_site_aniso_U_11
 _atom_site_aniso_U_22
 _atom_site_aniso_U_33
 _atom_site_aniso_U_23
 _atom_site_aniso_U_13
 _atom_site_aniso_U_12
Te 0.01585(9) 0.01448(9) 0.01776(8) 0.00100(9) 0.00846(6) 0.00131(10)
N1 0.0296(15) 0.0189(14) 0.0237(12) 0.0045(10) 0.0149(11) 0.0062(11)
N2 0.0170(13) 0.0178(12) 0.0226(11) 0.0031(9) 0.0074(10) -0.0029(11)
N3 0.0322(17) 0.0204(18) 0.0464(16) 0.0069(11) 0.0244(13) 0.0104(12)
N4 0.0223(14) 0.0184(14) 0.0298(12) 0.0061(10) 0.0119(11) 0.0032(11)
N5 0.0248(15) 0.0203(13) 0.0287(13) 0.0023(12) 0.0092(11) 0.0069(12)
N6 0.062(2) 0.049(2) 0.0654(19) 0.0374(19) 0.0409(18) 0.020(2)
C11 0.0167(15) 0.0130(15) 0.0257(14) 0.0003(11) 0.0073(11) 0.0006(11)
C21 0.0188(16) 0.0156(15) 0.0251(14) 0.0002(12) 0.0101(11) 0.0023(12)
C31 0.0307(19) 0.0156(15) 0.0433(17) 0.0031(13) 0.0233(14) 0.0027(13)
C41 0.0156(17) 0.0217(18) 0.0489(19) -0.0051(14) 0.0110(14) -0.0013(13)
C51 0.0226(17) 0.0211(17) 0.0271(15) -0.0045(13) -0.0018(12) 0.0073(13)
C61 0.0265(18) 0.0153(15) 0.0238(14) 0.0013(12) 0.0106(12) 0.0049(13)
F21 0.0289(12) 0.0304(11) 0.0227(8) 0.0047(8) 0.0121(8) -0.0003(9)
F31 0.0316(12) 0.0330(12) 0.0615(12) 0.0077(9) 0.0306(10) -0.0021(8)
F41 0.0205(10) 0.0391(15) 0.0722(14) -0.0110(11) 0.0113(9) -0.0097(9)
F51 0.0358(15) 0.0348(11) 0.0332(10) -0.0073(9) -0.0071(9) 0.0040(9)
F61 0.0389(12) 0.0303(10) 0.0217(8) 0.0033(7) 0.0132(7) 0.0014(8)
C12 0.0234(16) 0.0141(15) 0.0165(12) -0.0013(10) 0.0095(11) -0.0023(12)
C22 0.0271(17) 0.0156(15) 0.0246(14) 0.0047(12) 0.0125(12) -0.0013(13)
C32 0.036(2) 0.0212(17) 0.0202(14) 0.0026(12) 0.0055(13) -0.0099(15)
C42 0.052(2) 0.0221(17) 0.0235(14) -0.0033(13) 0.0218(15) -0.0104(16)
C52 0.041(2) 0.0195(16) 0.0363(16) -0.0030(13) 0.0284(15) -0.0044(15)
C62 0.0271(18) 0.0182(16) 0.0271(14) 0.0002(12) 0.0147(13) -0.0032(13)
F22 0.0206(10) 0.0276(10) 0.0315(9) 0.0046(7) 0.0078(7) 0.0027(7)
F32 0.0419(14) 0.0349(11) 0.0234(9) 0.0015(8) -0.0023(8) -0.0114(10)
F42 0.0815(19) 0.0426(14) 0.0272(9) -0.0165(8) 0.0304(10) -0.0158(11)
F52 0.0599(16) 0.0389(12) 0.0513(11) -0.0101(9) 0.0424(11) 0.0026(10)
F62 0.0219(11) 0.0300(11) 0.0365(10) -0.0030(8) 0.0145(8) 0.0047(8)

loop_
 _geom_bond_atom_site_label_1
 _geom_bond_atom_site_label_2
 _geom_bond_distance
 _geom_bond_site_symmetry_2
 _geom_bond_publ_flag
Te C12 2.106(3) . ?
Te C11 2.106(3) . ?
Te N4 2.185(2) . ?
Te N1 2.208(2) . ?
N1 N2 1.208(4) . ?
N2 N3 1.143(4) . ?
N4 N5 1.216(4) . ?
N5 N6 1.144(4) . ?
C11 C61 1.386(4) . ?
C11 C21 1.392(4) . ?
C21 F21 1.338(3) . ?
C21 C31 1.362(5) . ?
C31 F31 1.339(4) . ?
C31 C41 1.384(4) . ?
C41 F41 1.323(4) . ?
C41 C51 1.387(5) . ?
C51 F51 1.346(3) . ?
C51 C61 1.359(5) . ?
C61 F61 1.345(4) . ?
C12 C62 1.373(4) . ?
C12 C22 1.389(4) . ?
C22 F22 1.330(4) . ?
C22 C32 1.377(4) . ?
C32 F32 1.341(4) . ?
C32 C42 1.366(5) . ?
C42 F42 1.338(3) . ?
C42 C52 1.383(5) . ?
C52 F52 1.326(4) . ?
C52 C62 1.376(4) . ?
C62 F62 1.346(4) . ?

loop_
 _geom_angle_atom_site_label_1
 _geom_angle_atom_site_label_2
 _geom_angle_atom_site_label_3
 _geom_angle
 _geom_angle_site_symmetry_1
 _geom_angle_site_symmetry_3
 _geom_angle_publ_flag
C12 Te C11 100.29(11) . . ?
C12 Te N4 85.41(10) . . ?
C11 Te N4 83.90(10) . . ?
C12 Te N1 82.86(10) . . ?
C11 Te N1 84.37(10) . . ?
N4 Te N1 161.65(9) . . ?
N2 N1 Te 118.46(18) . . ?
N3 N2 N1 174.2(3) . . ?
N5 N4 Te 115.5(2) . . ?
N6 N5 N4 175.2(3) . . ?
C61 C11 C21 117.0(3) . . ?
C61 C11 Te 117.6(2) . . ?
C21 C11 Te 125.4(2) . . ?
F21 C21 C31 118.2(3) . . ?
F21 C21 C11 120.4(3) . . ?
C31 C21 C11 121.4(3) . . ?
F31 C31 C21 120.4(3) . . ?
F31 C31 C41 118.8(3) . . ?
C21 C31 C41 120.7(3) . . ?
F41 C41 C31 120.7(3) . . ?
F41 C41 C51 120.7(3) . . ?
C31 C41 C51 118.6(3) . . ?
F51 C51 C61 120.5(3) . . ?
F51 C51 C41 119.4(3) . . ?
C61 C51 C41 120.1(3) . . ?
F61 C61 C51 119.0(3) . . ?
F61 C61 C11 118.8(3) . . ?
C51 C61 C11 122.2(3) . . ?
C62 C12 C22 117.9(3) . . ?
C62 C12 Te 124.3(2) . . ?
C22 C12 Te 117.8(2) . . ?
F22 C22 C32 118.7(3) . . ?
F22 C22 C12 120.7(2) . . ?
C32 C22 C12 120.6(3) . . ?
F32 C32 C42 120.3(3) . . ?
F32 C32 C22 119.4(3) . . ?
C42 C32 C22 120.3(3) . . ?
F42 C42 C32 119.9(3) . . ?
F42 C42 C52 119.9(3) . . ?
C32 C42 C52 120.3(3) . . ?
F52 C52 C62 121.0(3) . . ?
F52 C52 C42 120.4(3) . . ?
C62 C52 C42 118.7(3) . . ?
F62 C62 C12 120.7(2) . . ?
F62 C62 C52 117.1(3) . . ?
C12 C62 C52 122.2(3) . . ?

loop_
 _geom_torsion_atom_site_label_1
 _geom_torsion_atom_site_label_2
 _geom_torsion_atom_site_label_3
 _geom_torsion_atom_site_label_4
 _geom_torsion
 _geom_torsion_site_symmetry_1
 _geom_torsion_site_symmetry_2
 _geom_torsion_site_symmetry_3
 _geom_torsion_site_symmetry_4
 _geom_torsion_publ_flag
C12 Te N1 N2 -147.5(3) . . . . ?
C11 Te N1 N2 111.3(2) . . . . ?
N4 Te N1 N2 161.8(3) . . . . ?
Te N1 N2 N3 -157(3) . . . . ?
C12 Te N4 N5 122.3(2) . . . . ?
C11 Te N4 N5 -136.8(2) . . . . ?
N1 Te N4 N5 172.7(2) . . . . ?
Te N4 N5 N6 -172(4) . . . . ?
C12 Te C11 C61 147.7(2) . . . . ?
N4 Te C11 C61 63.5(2) . . . . ?
N1 Te C11 C61 -130.6(2) . . . . ?
C12 Te C11 C21 -35.1(3) . . . . ?
N4 Te C11 C21 -119.2(3) . . . . ?
N1 Te C11 C21 46.6(3) . . . . ?
C61 C11 C21 F21 -178.7(3) . . . . ?
Te C11 C21 F21 4.0(4) . . . . ?
C61 C11 C21 C31 0.4(4) . . . . ?
Te C11 C21 C31 -176.9(2) . . . . ?
F21 C21 C31 F31 0.5(4) . . . . ?
C11 C21 C31 F31 -178.7(3) . . . . ?
F21 C21 C31 C41 178.9(3) . . . . ?
C11 C21 C31 C41 -0.2(5) . . . . ?
F31 C31 C41 F41 -3.0(5) . . . . ?
C21 C31 C41 F41 178.5(3) . . . . ?
F31 C31 C41 C51 178.0(3) . . . . ?
C21 C31 C41 C51 -0.5(5) . . . . ?
F41 C41 C51 F51 1.4(5) . . . . ?
C31 C41 C51 F51 -179.6(3) . . . . ?
F41 C41 C51 C61 -178.0(3) . . . . ?
C31 C41 C51 C61 1.0(5) . . . . ?
F51 C51 C61 F61 -1.8(4) . . . . ?
C41 C51 C61 F61 177.6(3) . . . . ?
F51 C51 C61 C11 179.8(3) . . . . ?
C41 C51 C61 C11 -0.8(5) . . . . ?
C21 C11 C61 F61 -178.3(3) . . . . ?
Te C11 C61 F61 -0.8(4) . . . . ?
C21 C11 C61 C51 0.1(5) . . . . ?
Te C11 C61 C51 177.6(2) . . . . ?
C11 Te C12 C62 -37.1(3) . . . . ?
N4 Te C12 C62 45.9(3) . . . . ?
N1 Te C12 C62 -120.0(3) . . . . ?
C11 Te C12 C22 146.0(2) . . . . ?
N4 Te C12 C22 -131.1(2) . . . . ?
N1 Te C12 C22 63.1(2) . . . . ?
C62 C12 C22 F22 -178.5(3) . . . . ?
Te C12 C22 F22 -1.4(4) . . . . ?
C62 C12 C22 C32 1.1(4) . . . . ?
Te C12 C22 C32 178.2(2) . . . . ?
F22 C22 C32 F32 -0.3(4) . . . . ?
C12 C22 C32 F32 -179.9(3) . . . . ?
F22 C22 C32 C42 -179.9(3) . . . . ?
C12 C22 C32 C42 0.5(5) . . . . ?
F32 C32 C42 F42 0.5(5) . . . . ?
C22 C32 C42 F42 -180.0(3) . . . . ?
F32 C32 C42 C52 179.1(3) . . . . ?
C22 C32 C42 C52 -1.3(5) . . . . ?
F42 C42 C52 F52 -0.1(5) . . . . ?
C32 C42 C52 F52 -178.8(3) . . . . ?
F42 C42 C52 C62 179.2(3) . . . . ?
C32 C42 C52 C62 0.5(5) . . . . ?
C22 C12 C62 F62 -179.8(3) . . . . ?
Te C12 C62 F62 3.3(4) . . . . ?
C22 C12 C62 C52 -1.9(4) . . . . ?
Te C12 C62 C52 -178.8(2) . . . . ?
F52 C52 C62 F62 -1.6(4) . . . . ?
C42 C52 C62 F62 179.1(3) . . . . ?
F52 C52 C62 C12 -179.6(3) . . . . ?
C42 C52 C62 C12 1.1(5) . . . . ?

loop_
 _geom_contact_atom_site_label_1
 _geom_contact_atom_site_label_2
 _geom_contact_distance
 _geom_contact_site_symmetry_1
 _geom_contact_site_symmetry_2
 _geom_contact_publ_flag
? ? ? ? ? ?

loop_
 _geom_hbond_atom_site_label_D
 _geom_hbond_atom_site_label_H
 _geom_hbond_atom_site_label_A
 _geom_hbond_distance_DH
 _geom_hbond_distance_HA
 _geom_hbond_distance_DA
 _geom_hbond_angle_DHA
 _geom_hbond_site_symmetry_A
 _geom_hbond_publ_flag
? ? ? ? ? ? ? ? ?

_geom_special_details         ?

_kl_archive_SHELXL_comment  'release 97-2'
_kl_archive_SHELXL_res
;
TITL  e061 in P21/c (14, sir97
CELL  0.71073   15.3104    6.1035   18.0152    90.000   113.348    90.000
ZERR  4          0.0013    0.0003    0.0013     0.000     0.009     0.000
LATT  1
SYMM -X,  .50000+Y,  .50000-Z
SFAC    C   N   F   TE
UNIT    48  24  40   4
L.S.      8
BOND
CONF
TEMP  -73
ACTA
FMAP      2
PLAN     -25
WGHT    0.024300
FVAR       0.34434
TE    4    0.313833    0.002796    0.216243    11.00000    0.01585    0.01448 =
         0.01776    0.00100    0.00846    0.00131
N1    2    0.367063   -0.291974    0.291787    11.00000    0.02964    0.01887 =
         0.02372    0.00449    0.01491    0.00619
N2    2    0.415483   -0.420065    0.273626    11.00000    0.01698    0.01776 =
         0.02262    0.00315    0.00744   -0.00293
N3    2    0.459005   -0.554272    0.259926    11.00000    0.03217    0.02037 =
         0.04640    0.00689    0.02442    0.01040
N4    2    0.229992    0.293655    0.161067    11.00000    0.02226    0.01842 =
         0.02984    0.00605    0.01190    0.00323
N5    2    0.258779    0.401231    0.118611    11.00000    0.02479    0.02034 =
         0.02870    0.00233    0.00920    0.00687
N6    2    0.281211    0.513224    0.078335    11.00000    0.06160    0.04926 =
         0.06536    0.03742    0.04095    0.02021
C11   1    0.179787   -0.147818    0.182449    11.00000    0.01670    0.01295 =
         0.02570    0.00031    0.00727    0.00063
C21   1    0.144840   -0.242939    0.235369    11.00000    0.01877    0.01560 =
         0.02509    0.00017    0.01012    0.00230
C31   1    0.058904   -0.346069    0.207771    11.00000    0.03066    0.01564 =
         0.04329    0.00311    0.02331    0.00272
C41   1    0.003396   -0.358768    0.125750    11.00000    0.01563    0.02174 =
         0.04892   -0.00512    0.01101   -0.00129
C51   1    0.036788   -0.262629    0.072285    11.00000    0.02257    0.02107 =
         0.02707   -0.00445   -0.00181    0.00726
C61   1    0.122986   -0.161639    0.100581    11.00000    0.02649    0.01530 =
         0.02375    0.00130    0.01060    0.00485
F21   3    0.194856   -0.232414    0.315280    11.00000    0.02893    0.03044 =
         0.02267    0.00468    0.01206   -0.00030
F31   3    0.025724   -0.432751    0.259778    11.00000    0.03156    0.03295 =
         0.06146    0.00765    0.03060   -0.00210
F41   3   -0.079088   -0.463091    0.098903    11.00000    0.02050    0.03913 =
         0.07219   -0.01098    0.01130   -0.00974
F51   3   -0.016533   -0.272219   -0.007675    11.00000    0.03581    0.03484 =
         0.03323   -0.00735   -0.00707    0.00400
F61   3    0.155363   -0.076657    0.047374    11.00000    0.03886    0.03034 =
         0.02169    0.00333    0.01317    0.00139
C12   1    0.328459    0.144588    0.327102    11.00000    0.02343    0.01406 =
         0.01653   -0.00128    0.00953   -0.00225
C22   1    0.419165    0.155909    0.387941    11.00000    0.02705    0.01563 =
         0.02460    0.00468    0.01251   -0.00131
C32   1    0.433837    0.252141    0.461057    11.00000    0.03557    0.02124 =
         0.02017    0.00255    0.00550   -0.00991
C42   1    0.359021    0.336431    0.474897    11.00000    0.05233    0.02208 =
         0.02349   -0.00333    0.02185   -0.01036
C52   1    0.268099    0.329765    0.414970    11.00000    0.04098    0.01951 =
         0.03630   -0.00300    0.02838   -0.00441
C62   1    0.254867    0.235326    0.341916    11.00000    0.02714    0.01817 =
         0.02714    0.00021    0.01466   -0.00319
F22   3    0.493642    0.075271    0.376653    11.00000    0.02064    0.02759 =
         0.03152    0.00456    0.00780    0.00272
F32   3    0.522140    0.261110    0.518757    11.00000    0.04195    0.03488 =
         0.02340    0.00147   -0.00230   -0.01139
F42   3    0.374023    0.429687    0.546147    11.00000    0.08148    0.04261 =
         0.02723   -0.01653    0.03039   -0.01583
F52   3    0.195622    0.414916    0.427768    11.00000    0.05985    0.03887 =
         0.05132   -0.01009    0.04242    0.00258
F62   3    0.165307    0.228920    0.285442    11.00000    0.02190    0.03004 =
         0.03652   -0.00303    0.01455    0.00469
HKLF      4

REM   e061 in P21/c (14, sir97
REM R1 =  0.0204 for   2060 Fo > 4sig(Fo)  and  0.0361 for all   2868 data
REM    262 parameters refined using      0 restraints

#===END

WGHT      0.0243      0.0000
REM Highest difference peak  0.329,  deepest hole -0.372,  1-sigma level  0.076
Q1    1   0.2399  0.4802  0.0486  11.00000  0.05    0.33
Q2    1   0.3787  0.0029  0.2332  11.00000  0.05    0.30
Q3    1   0.2400 -0.0033  0.1944  11.00000  0.05    0.30
Q4    1   0.3125 -0.0644  0.1755  11.00000  0.05    0.28
;

_kl_archive_SCHAKAL_comment ?
_kl_archive_SCHAKAL_dat     ?
_kl_archive_ORTEP_comment   ?
_kl_archive_ORTEP_ins       ?
_kl_archive_rtf_text        ?


#===END

data_e082

_publ_contact_author_name         'Prof. Thomas M. Klapoetke'
_publ_contact_author_address
;
Department of Chemistry
Ludwig-Maximilians-University
Butenandtstr. 5-13 (Haus D)
D-81377 Munich, Germany
;
_publ_contact_author_email        'tmk@cup.uni-muenchen.de'
_publ_contact_author_phone        '+49 89 2180 7491'
_publ_contact_author_fax          '+49 89 2180 7492' 

_publ_author_name                 'Krumm, Burkhard'
_publ_author_name                 'Ruscitti, Oliver P.'
_publ_author_name                 'Mayer, Peter'

_publ_requested_journal           'Inorg. Chem.'

_publ_section_title              
;
First Synthesis and Structures of Aryltellurium(IV) Diazides
;

_audit_author_name                'Mayer, P.'
_audit_block_code                 Te_(N3)2_(C6H5)2_e082_klapoetke
_audit_creation_method            'form98_1/compatible with shelxl97-2'
_audit_creation_date              04-Apr-00

_chemical_name_systematic         ?
_chemical_compound_source         ?

_chemical_name_common             'Te(N3)2(C6H5)2'
_chemical_formula_moiety          'Te N6 C12 H10'
_chemical_formula_sum
 'C12 H10 N6 Te'
_chemical_formula_weight          365.85

loop_
 _atom_type_symbol
 _atom_type_description
 _atom_type_scat_dispersion_real
 _atom_type_scat_dispersion_imag
 _atom_type_scat_source
'C'  'C'   0.0033   0.0016
'International Tables Vol C Tables 4.2.6.8 and 6.1.1.4'
'H'  'H'   0.0000   0.0000
'International Tables Vol C Tables 4.2.6.8 and 6.1.1.4'
'N'  'N'   0.0061   0.0033
'International Tables Vol C Tables 4.2.6.8 and 6.1.1.4'
'Te'  'Te'  -0.5308   1.6751
'International Tables Vol C Tables 4.2.6.8 and 6.1.1.4'

_symmetry_cell_setting            orthorhombic
_symmetry_space_group_name_H-M    'P b c a'
_symmetry_Int_Tables_number       61

loop_
 _symmetry_equiv_pos_as_xyz
'x, y, z'
'-x+1/2, -y, z+1/2'
'x+1/2, -y+1/2, -z'
'-x, y+1/2, -z+1/2'
'-x, -y, -z'
'x-1/2, y, -z-1/2'
'-x-1/2, y-1/2, z'
'x, -y-1/2, z-1/2'

_cell_length_a                    7.5801(4)
_cell_length_b                    14.9046(9)
_cell_length_c                    23.0845(14)
_cell_angle_alpha                 90
_cell_angle_beta                  90
_cell_angle_gamma                 90
_cell_volume                      2608.0(3)
_cell_formula_units_Z             8
_cell_measurement_temperature     150(3)
_cell_measurement_reflns_used     5000
_cell_measurement_theta_min       3.1
_cell_measurement_theta_max       25.8
_cell_special_details             'Orthorhombic P (as derived from metrics)'

_exptl_crystal_description        irregular
_exptl_crystal_colour             colourless
_exptl_crystal_size_max           0.47
_exptl_crystal_size_mid           0.10
_exptl_crystal_size_min           0.08
_exptl_crystal_density_meas       ?
_exptl_crystal_density_diffrn     1.8635(2)
_exptl_crystal_density_method     'not measured'
_exptl_crystal_F_000              1408
_exptl_absorpt_coefficient_mu     2.277
_exptl_absorpt_correction_type    numerical
_exptl_absorpt_correction_T_min   0.5440
_exptl_absorpt_correction_T_max   0.7794
_exptl_absorpt_process_details
;
shape of the crystal calculated with X-Shape, absorption correction with
XRed, rev. 1.09, Stoe (Darmstadt, Germany)
;
_exptl_special_details            ?

loop_
 _exptl_crystal_face_index_h
 _exptl_crystal_face_index_k
 _exptl_crystal_face_index_l
 _exptl_crystal_face_perp_dist
0   0  -1  0.5738
-1   2 -10  0.1022
-1  -1  10  0.1023
1  -1   6  0.1629
0   1   0  0.0480
0  -1   0  0.0720

_diffrn_ambient_temperature       150(3)
_diffrn_source_type                'Spellman DF4 Series'
_diffrn_source_power               2.75_kW
_diffrn_source_voltage             55_kV
_diffrn_source_current             50_mA
_diffrn_radiation_wavelength      0.71073
_diffrn_radiation_type            MoK\a
_diffrn_radiation_source          'fine-focus sealed tube'
_diffrn_radiation_monochromator   graphite
_diffrn_radiation_collimation     '0.5 mm collimator'
_diffrn_measurement_device        'image-plate area detector'
_diffrn_measurement_device_type   'Stoe IPDS'
_diffrn_measurement_method        'area detection'
_diffrn_detector_area_resol_mean  ?
_kl_diffrn_detector_area_phi_start      0.0
_kl_diffrn_detector_area_phi_end        120.0
_kl_diffrn_detector_area_phi_incr       0.8
_kl_diffrn_detector_area_expos_time     6.00_min
_kl_diffrn_detector_area_plate_dist     70.0_mm
_kl_diffrn_detector_area_eff_mos_spread 0.007
_kl_diffrn_detector_area_profile_funct  dynamic
_kl_diffrn_detector_area_profile_min    11
_kl_diffrn_detector_area_profile_max    21

_diffrn_special_details           ?

_diffrn_reflns_number             8285
_diffrn_reflns_av_R_equivalents   0.0387
_diffrn_reflns_av_sigmaI/netI     0.0336
_diffrn_reflns_limit_h_min        -9
_diffrn_reflns_limit_h_max        8
_diffrn_reflns_limit_k_min        -8
_diffrn_reflns_limit_k_max        17
_diffrn_reflns_limit_l_min        -28
_diffrn_reflns_limit_l_max        28
_diffrn_reflns_theta_min          3.14
_diffrn_reflns_theta_max          25.83
_diffrn_measured_fraction_theta_max    0.912
_diffrn_reflns_theta_full              25.83
_diffrn_measured_fraction_theta_full   0.912

_refine_diff_density_max    0.426
_refine_diff_density_min   -0.459
_refine_diff_density_rms    0.086

_reflns_number_total              2295
_reflns_number_gt                 1798
_reflns_threshold_expression      >2sigma(I)
_reflns_special_details           ?

_computing_data_collection        'Stoe IPDS software (Darmstadt, Germany)'
_computing_cell_refinement        'Stoe IPDS software (Darmstadt, Germany)'
_computing_data_reduction         'Stoe IPDS software (Darmstadt, Germany)'
_computing_structure_solution
 'SIR97 (Cascarano et al.,Acta Crystallogr., Sect A, 1996, C79)'

_computing_structure_refinement
 'SHELXL-97 (G. M. Sheldrick. University of G\"ottingen, 97-2 version)'

_computing_molecular_graphics
;ORTEP (M. N. Burnett, C. K. Johnson, ORTEP-III: Oak Ridge Thermal Ellipsoid
 Plot Program for Crystal Structure Illustrations, Oak Ridge National
 Laboratory Report ORNL-6895, 1996). Windows version (L. J. Farrugia, Univ.
 Glasgow) used --- SCHAKAL (E. Keller, University of  Freiburg (Breisgau),
 Germany, 1995).
;

_computing_publication_material
;PLATON (A. L. Spek, Acta Crystallogr, Sect. A, 1990, 46, C34, 1995 version).
--- T.B.Cohen, Pure Appl. Chem. 1996,68,2339-2359 (atomic masses).
;

_refine_ls_structure_factor_coef  Fsqd
_refine_ls_matrix_type            full
_refine_ls_weighting_scheme       calc
_atom_sites_solution_primary      direct
_atom_sites_solution_secondary    difmap
_atom_sites_solution_hydrogens    geom
_refine_ls_hydrogen_treatment     refxyz
_refine_ls_extinction_method      none
_refine_ls_extinction_coef        ?
_refine_ls_abs_structure_details  ?
_refine_ls_abs_structure_Flack    ?
_refine_ls_number_reflns          2295
_refine_ls_number_parameters      203
_refine_ls_number_restraints      0
_refine_ls_R_factor_all           0.0319
_refine_ls_R_factor_gt            0.0209
_refine_ls_wR_factor_ref          0.0447
_refine_ls_wR_factor_gt           0.0429
_refine_ls_goodness_of_fit_ref    0.917
_refine_ls_restrained_S_all       0.917
_refine_ls_shift/su_max           0.001
_refine_ls_shift/su_mean          0.000
_refine_special_details
;
1 common U for all H atoms
;

loop_
 _atom_site_label
 _atom_site_type_symbol
 _atom_site_fract_x
 _atom_site_fract_y
 _atom_site_fract_z
 _atom_site_U_iso_or_equiv
 _atom_site_adp_type
 _atom_site_occupancy
 _atom_site_symmetry_multiplicity
 _atom_site_calc_flag
 _atom_site_refinement_flags
 _atom_site_disorder_assembly
 _atom_site_disorder_group
Te Te 0.35651(2) 0.071923(12) 0.190156(6) 0.00917(7) Uani 1 1 d . . .
N1 N 0.0706(3) 0.03165(19) 0.19627(9) 0.0146(5) Uani 1 1 d . . .
N2 N 0.0226(3) -0.0288(2) 0.16436(9) 0.0139(6) Uani 1 1 d . . .
N3 N -0.0270(4) -0.0855(2) 0.13528(10) 0.0276(8) Uani 1 1 d . . .
N4 N 0.6396(3) 0.0990(2) 0.17727(9) 0.0182(6) Uani 1 1 d . . .
N5 N 0.6939(3) 0.1069(2) 0.12794(10) 0.0167(6) Uani 1 1 d . . .
N6 N 0.7532(4) 0.1153(3) 0.08298(10) 0.0306(8) Uani 1 1 d . . .
C11 C 0.4129(4) -0.0660(2) 0.18438(10) 0.0105(6) Uani 1 1 d . . .
C21 C 0.5228(4) -0.1008(2) 0.14181(12) 0.0159(7) Uani 1 1 d . . .
H21 H 0.577(5) -0.060(3) 0.1111(14) 0.032(3) Uiso 1 1 d . . .
C31 C 0.5644(5) -0.1900(2) 0.14324(12) 0.0197(7) Uani 1 1 d . . .
H31 H 0.645(5) -0.212(3) 0.1163(14) 0.032(3) Uiso 1 1 d . . .
C41 C 0.5009(4) -0.2459(2) 0.18695(13) 0.0176(6) Uani 1 1 d . . .
H41 H 0.526(5) -0.301(3) 0.1853(14) 0.032(3) Uiso 1 1 d . . .
C51 C 0.3910(4) -0.2103(2) 0.22925(11) 0.0163(7) Uani 1 1 d . . .
H51 H 0.344(5) -0.253(3) 0.2592(14) 0.032(3) Uiso 1 1 d . . .
C61 C 0.3447(4) -0.1210(2) 0.22779(10) 0.0114(6) Uani 1 1 d . . .
H61 H 0.263(5) -0.099(3) 0.2553(14) 0.032(3) Uiso 1 1 d . . .
C12 C 0.3083(4) 0.1073(2) 0.10296(10) 0.0131(7) Uani 1 1 d . . .
C22 C 0.3182(4) 0.1973(3) 0.09041(12) 0.0194(7) Uani 1 1 d . . .
H22 H 0.359(5) 0.238(3) 0.1167(14) 0.032(3) Uiso 1 1 d . . .
C32 C 0.2659(5) 0.2271(3) 0.03593(13) 0.0287(9) Uani 1 1 d . . .
H32 H 0.265(5) 0.281(3) 0.0295(14) 0.032(3) Uiso 1 1 d . . .
C42 C 0.2048(5) 0.1664(3) -0.00455(12) 0.0288(9) Uani 1 1 d . . .
H42 H 0.158(5) 0.185(3) -0.0398(14) 0.032(3) Uiso 1 1 d . . .
C52 C 0.2007(5) 0.0773(3) 0.00786(12) 0.0286(9) Uani 1 1 d . . .
H52 H 0.163(5) 0.037(3) -0.0160(15) 0.032(3) Uiso 1 1 d . . .
C62 C 0.2549(5) 0.0453(3) 0.06197(11) 0.0192(7) Uani 1 1 d . . .
H62 H 0.249(5) -0.013(3) 0.0668(14) 0.032(3) Uiso 1 1 d . . .

loop_
 _atom_site_aniso_label
 _atom_site_aniso_U_11
 _atom_site_aniso_U_22
 _atom_site_aniso_U_33
 _atom_site_aniso_U_23
 _atom_site_aniso_U_13
 _atom_site_aniso_U_12
Te 0.01143(10) 0.00486(11) 0.01122(9) -0.00063(6) 0.00011(6) -0.00023(9)
N1 0.0127(12) 0.0113(15) 0.0198(10) 0.0011(10) 0.0027(9) -0.0027(12)
N2 0.0140(13) 0.0132(16) 0.0144(10) 0.0024(10) 0.0005(9) 0.0004(12)
N3 0.0234(16) 0.035(2) 0.0242(13) -0.0068(12) 0.0014(10) -0.0125(15)
N4 0.0118(12) 0.0226(18) 0.0202(11) -0.0008(9) -0.0013(9) -0.0051(13)
N5 0.0154(14) 0.0084(17) 0.0263(13) -0.0002(10) -0.0004(10) -0.0051(12)
N6 0.0312(17) 0.033(2) 0.0279(15) 0.0012(12) 0.0105(12) -0.0083(16)
C11 0.0107(13) 0.0033(16) 0.0176(11) -0.0003(11) -0.0023(10) 0.0003(12)
C21 0.0173(17) 0.0098(18) 0.0208(13) -0.0009(11) 0.0044(11) -0.0018(14)
C31 0.0188(17) 0.013(2) 0.0272(14) -0.0050(12) 0.0071(13) 0.0041(15)
C41 0.0175(16) 0.0054(17) 0.0300(15) -0.0010(12) -0.0033(12) 0.0012(14)
C51 0.0108(16) 0.0141(19) 0.0239(13) 0.0046(12) -0.0027(10) -0.0022(14)
C61 0.0106(14) 0.0072(17) 0.0163(12) 0.0013(10) -0.0009(11) -0.0001(14)
C12 0.0128(15) 0.0156(18) 0.0110(11) 0.0025(10) 0.0007(10) 0.0033(13)
C22 0.0220(19) 0.013(2) 0.0228(14) 0.0014(11) 0.0041(11) -0.0007(15)
C32 0.035(2) 0.023(3) 0.0281(15) 0.0130(15) 0.0068(14) 0.0104(19)
C42 0.0257(19) 0.046(3) 0.0149(13) 0.0117(14) 0.0024(11) 0.0022(19)
C52 0.0260(18) 0.046(3) 0.0134(12) -0.0026(15) -0.0010(11) -0.008(2)
C62 0.0178(16) 0.018(2) 0.0216(14) -0.0012(12) 0.0028(11) -0.0035(14)

loop_
 _geom_bond_atom_site_label_1
 _geom_bond_atom_site_label_2
 _geom_bond_distance
 _geom_bond_site_symmetry_2
 _geom_bond_publ_flag
Te C11 2.104(3) . ?
Te C12 2.113(2) . ?
Te N4 2.204(3) . ?
Te N1 2.253(3) . ?
N1 N2 1.220(4) . ?
N2 N3 1.143(4) . ?
N4 N5 1.217(3) . ?
N5 N6 1.138(3) . ?
C11 C21 1.388(4) . ?
C11 C61 1.394(4) . ?
C21 C31 1.367(5) . ?
C21 H21 1.02(4) . ?
C31 C41 1.394(5) . ?
C31 H31 0.93(4) . ?
C41 C51 1.389(4) . ?
C41 H41 0.85(5) . ?
C51 C61 1.378(5) . ?
C51 H51 1.01(4) . ?
C61 H61 0.94(4) . ?
C12 C22 1.375(5) . ?
C12 C62 1.384(5) . ?
C22 C32 1.391(5) . ?
C22 H22 0.91(4) . ?
C32 C42 1.381(6) . ?
C32 H32 0.81(5) . ?
C42 C52 1.359(6) . ?
C42 H42 0.93(4) . ?
C52 C62 1.399(4) . ?
C52 H52 0.86(4) . ?
C62 H62 0.88(5) . ?

loop_
 _geom_angle_atom_site_label_1
 _geom_angle_atom_site_label_2
 _geom_angle_atom_site_label_3
 _geom_angle
 _geom_angle_site_symmetry_1
 _geom_angle_site_symmetry_3
 _geom_angle_publ_flag
C11 Te C12 102.64(11) . . ?
C11 Te N4 88.41(11) . . ?
C12 Te N4 89.66(10) . . ?
C11 Te N1 86.51(10) . . ?
C12 Te N1 87.71(10) . . ?
N4 Te N1 173.64(9) . . ?
N2 N1 Te 116.49(19) . . ?
N3 N2 N1 178.0(3) . . ?
N5 N4 Te 118.25(19) . . ?
N6 N5 N4 176.4(3) . . ?
C21 C11 C61 120.8(3) . . ?
C21 C11 Te 122.1(2) . . ?
C61 C11 Te 116.9(2) . . ?
C31 C21 C11 119.0(3) . . ?
C31 C21 H21 120(2) . . ?
C11 C21 H21 121(2) . . ?
C21 C31 C41 121.3(3) . . ?
C21 C31 H31 119(3) . . ?
C41 C31 H31 120(3) . . ?
C51 C41 C31 119.2(3) . . ?
C51 C41 H41 123(2) . . ?
C31 C41 H41 118(2) . . ?
C61 C51 C41 120.3(3) . . ?
C61 C51 H51 123(2) . . ?
C41 C51 H51 117(2) . . ?
C51 C61 C11 119.4(3) . . ?
C51 C61 H61 119(3) . . ?
C11 C61 H61 122(3) . . ?
C22 C12 C62 121.6(3) . . ?
C22 C12 Te 115.8(2) . . ?
C62 C12 Te 122.3(2) . . ?
C12 C22 C32 119.1(3) . . ?
C12 C22 H22 122(3) . . ?
C32 C22 H22 119(3) . . ?
C42 C32 C22 119.9(4) . . ?
C42 C32 H32 121(3) . . ?
C22 C32 H32 119(3) . . ?
C52 C42 C32 120.4(3) . . ?
C52 C42 H42 118(3) . . ?
C32 C42 H42 121(3) . . ?
C42 C52 C62 121.0(4) . . ?
C42 C52 H52 123(3) . . ?
C62 C52 H52 116(3) . . ?
C12 C62 C52 117.9(4) . . ?
C12 C62 H62 126(2) . . ?
C52 C62 H62 116(2) . . ?

loop_
 _geom_torsion_atom_site_label_1
 _geom_torsion_atom_site_label_2
 _geom_torsion_atom_site_label_3
 _geom_torsion_atom_site_label_4
 _geom_torsion
 _geom_torsion_site_symmetry_1
 _geom_torsion_site_symmetry_2
 _geom_torsion_site_symmetry_3
 _geom_torsion_site_symmetry_4
 _geom_torsion_publ_flag
C11 Te N1 N2 -41.2(2) . . . . ?
C12 Te N1 N2 61.7(2) . . . . ?
N4 Te N1 N2 -4.0(9) . . . . ?
Te N1 N2 N3 172(100) . . . . ?
C11 Te N4 N5 88.7(3) . . . . ?
C12 Te N4 N5 -14.0(3) . . . . ?
N1 Te N4 N5 51.6(9) . . . . ?
Te N4 N5 N6 177(100) . . . . ?
C12 Te C11 C21 44.1(2) . . . . ?
N4 Te C11 C21 -45.2(2) . . . . ?
N1 Te C11 C21 130.9(2) . . . . ?
C12 Te C11 C61 -140.2(2) . . . . ?
N4 Te C11 C61 130.5(2) . . . . ?
N1 Te C11 C61 -53.3(2) . . . . ?
C61 C11 C21 C31 -0.5(4) . . . . ?
Te C11 C21 C31 175.1(2) . . . . ?
C11 C21 C31 C41 -0.9(5) . . . . ?
C21 C31 C41 C51 1.0(5) . . . . ?
C31 C41 C51 C61 0.4(5) . . . . ?
C41 C51 C61 C11 -1.7(4) . . . . ?
C21 C11 C61 C51 1.8(4) . . . . ?
Te C11 C61 C51 -174.0(2) . . . . ?
C11 Te C12 C22 -161.7(2) . . . . ?
N4 Te C12 C22 -73.4(2) . . . . ?
N1 Te C12 C22 112.4(2) . . . . ?
C11 Te C12 C62 23.8(3) . . . . ?
N4 Te C12 C62 112.1(3) . . . . ?
N1 Te C12 C62 -62.1(3) . . . . ?
C62 C12 C22 C32 2.8(5) . . . . ?
Te C12 C22 C32 -171.7(2) . . . . ?
C12 C22 C32 C42 0.2(5) . . . . ?
C22 C32 C42 C52 -2.2(5) . . . . ?
C32 C42 C52 C62 1.2(5) . . . . ?
C22 C12 C62 C52 -3.7(5) . . . . ?
Te C12 C62 C52 170.5(2) . . . . ?
C42 C52 C62 C12 1.6(5) . . . . ?

loop_
 _geom_contact_atom_site_label_1
 _geom_contact_atom_site_label_2
 _geom_contact_distance
 _geom_contact_site_symmetry_1
 _geom_contact_site_symmetry_2
 _geom_contact_publ_flag
? ? ? ? ? ?

loop_
 _geom_hbond_atom_site_label_D
 _geom_hbond_atom_site_label_H
 _geom_hbond_atom_site_label_A
 _geom_hbond_distance_DH
 _geom_hbond_distance_HA
 _geom_hbond_distance_DA
 _geom_hbond_angle_DHA
 _geom_hbond_site_symmetry_A
 _geom_hbond_publ_flag
? ? ? ? ? ? ? ? ?

_geom_special_details         ?

_kl_archive_SHELXL_comment  'release 97-2'
_kl_archive_SHELXL_res
;
TITL  e082 in Pbca (61), sir97
CELL  0.71073    7.5801   14.9046   23.0845    90.000    90.000    90.000
ZERR  8          0.0004    0.0009    0.0014     0.000     0.000     0.000
LATT  1
SYMM   .50000-X,-Y,  .50000+Z
SYMM   .50000+X,  .50000-Y,-Z
SYMM -X,  .50000+Y,  .50000-Z
SFAC    C   H   N   TE
UNIT    96  80  48   8
L.S.      8

TEMP  -123
BOND  $H
CONF
ACTA

FMAP      2
PLAN     -30
WGHT    0.024800
FVAR       0.25682   0.03199
TE    4    0.356514    0.071923    0.190156    11.00000    0.01143    0.00486 =
         0.01122   -0.00063    0.00011   -0.00023
N1    3    0.070601    0.031645    0.196270    11.00000    0.01267    0.01133 =
         0.01977    0.00111    0.00271   -0.00267
N2    3    0.022590   -0.028826    0.164357    11.00000    0.01399    0.01324 =
         0.01445    0.00244    0.00047    0.00039
N3    3   -0.027047   -0.085546    0.135281    11.00000    0.02344    0.03515 =
         0.02422   -0.00676    0.00137   -0.01250
N4    3    0.639619    0.098983    0.177274    11.00000    0.01175    0.02257 =
         0.02021   -0.00080   -0.00128   -0.00509
N5    3    0.693894    0.106925    0.127936    11.00000    0.01538    0.00842 =
         0.02627   -0.00020   -0.00042   -0.00514
N6    3    0.753244    0.115328    0.082979    11.00000    0.03119    0.03274 =
         0.02793    0.00125    0.01051   -0.00825
C11   1    0.412949   -0.066036    0.184381    11.00000    0.01072    0.00326 =
         0.01759   -0.00031   -0.00229    0.00033
C21   1    0.522757   -0.100793    0.141808    11.00000    0.01731    0.00977 =
         0.02077   -0.00091    0.00436   -0.00179
H21   2    0.577432   -0.059923    0.111134    11.00000   21.00000
C31   1    0.564449   -0.190011    0.143244    11.00000    0.01878    0.01310 =
         0.02715   -0.00500    0.00711    0.00408
H31   2    0.644500   -0.212302    0.116313    11.00000   21.00000
C41   1    0.500897   -0.245915    0.186954    11.00000    0.01749    0.00537 =
         0.03005   -0.00100   -0.00331    0.00119
H41   2    0.526353   -0.301058    0.185327    11.00000   21.00000
C51   1    0.390987   -0.210329    0.229250    11.00000    0.01082    0.01415 =
         0.02390    0.00462   -0.00274   -0.00220
H51   2    0.344172   -0.253102    0.259212    11.00000   21.00000
C61   1    0.344659   -0.120982    0.227787    11.00000    0.01062    0.00725 =
         0.01630    0.00133   -0.00091   -0.00014
H61   2    0.263076   -0.099445    0.255311    11.00000   21.00000
C12   1    0.308339    0.107334    0.102962    11.00000    0.01281    0.01558 =
         0.01102    0.00250    0.00073    0.00326
C22   1    0.318160    0.197348    0.090413    11.00000    0.02202    0.01346 =
         0.02283    0.00143    0.00405   -0.00074
H22   2    0.358512    0.238143    0.116710    11.00000   21.00000
C32   1    0.265907    0.227088    0.035925    11.00000    0.03542    0.02272 =
         0.02805    0.01299    0.00680    0.01041
H32   2    0.265359    0.280735    0.029544    11.00000   21.00000
C42   1    0.204762    0.166372   -0.004550    11.00000    0.02568    0.04589 =
         0.01495    0.01175    0.00244    0.00219
H42   2    0.158383    0.185298   -0.039775    11.00000   21.00000
C52   1    0.200687    0.077266    0.007855    11.00000    0.02601    0.04624 =
         0.01344   -0.00262   -0.00102   -0.00846
H52   2    0.163169    0.037397   -0.015998    11.00000   21.00000
C62   1    0.254854    0.045252    0.061969    11.00000    0.01775    0.01836 =
         0.02156   -0.00118    0.00276   -0.00347
H62   2    0.249238   -0.013478    0.066824    11.00000   21.00000
HKLF      4

REM   e082 in Pbca (61), sir97
REM R1 =  0.0209 for   1798 Fo > 4sig(Fo)  and  0.0319 for all   2295 data
REM    203 parameters refined using      0 restraints

#===END

WGHT      0.0249      0.0000
REM Highest difference peak  0.426,  deepest hole -0.459,  1-sigma level  0.086
Q1    1   0.3503  0.0653  0.1503  11.00000  0.05    0.43
Q2    1   0.3572  0.0726  0.2287  11.00000  0.05    0.40
Q3    1   0.5747  0.0146  0.1733  11.00000  0.05    0.40
Q4    1   0.4281  0.0227  0.2305  11.00000  0.05    0.37
;

_kl_archive_SCHAKAL_comment ?
_kl_archive_SCHAKAL_dat     ?
_kl_archive_ORTEP_comment   ?
_kl_archive_ORTEP_ins       ?
_kl_archive_rtf_text        ?

#===END
